# Supplementary material for: Medicines in the Kitchen: Gender Roles Shape Ethnobotanical Knowledge in Marrakshi Households
Source: MDPI journal article supplement (doi:10.3390/foods10102332), 2021-09-30
Supplement: s1 [file s1]

```
> data<-i.Marrakech_dataset
```

### TOTAL N ITEMS

```
> m1<-glm(N_PI_total ~ Sex, family=quasipoisson, data=data)
> summary(m1)
```

Call:

```
glm(formula = N_PI_total ~ Sex, family = quasipoisson, data = data)
```

Deviance Residuals:

| Min     | 1Q      | Median  | 3Q     | Max    |
|---------|---------|---------|--------|--------|
| -4.2095 | -1.1654 | -0.3395 | 1.3521 | 3.4930 |

Coefficients:

|             | Estimate | Std. Error | t value | Pr(> t )     |
|-------------|----------|------------|---------|--------------|
| (Intercept) | 4.03483  | 0.04029    | 100.133 | < 2e-16 ***  |
| SexM        | -0.61045 | 0.07032    | -8.681  | 6.88e-12 *** |

---

Signif. codes: 0 '\*\*\*' 0.001 '\*\*' 0.01 '\*' 0.05 '.' 0.1 ' ' 1

(Dispersion parameter for quasipoisson family taken to be 2.753745)

Null deviance: 372.48 on 56 degrees of freedom  
Residual deviance: 152.98 on 55 degrees of freedom  
AIC: NA

Number of Fisher Scoring iterations: 4

```
> m2<-glm(N_PI_total ~ Age, family=quasipoisson, data=data)
> summary(m2)
```

Call:

```
glm(formula = N_PI_total ~ Age, family = quasipoisson, data = data)
```

Deviance Residuals:

| Min     | 1Q      | Median  | 3Q     | Max    |
|---------|---------|---------|--------|--------|
| -5.8674 | -2.1878 | -0.0143 | 1.9756 | 3.6374 |

Coefficients:

|             | Estimate | Std. Error | t value | Pr(> t )    |
|-------------|----------|------------|---------|-------------|
| (Intercept) | 3.4635   | 0.1240     | 27.920  | < 2e-16 *** |
| Age         | 0.1633   | 0.0556     | 2.936   | 0.00484 **  |

---

Signif. codes: 0 '\*\*\*' 0.001 '\*\*' 0.01 '\*' 0.05 '.' 0.1 ' ' 1

(Dispersion parameter for quasipoisson family taken to be 5.584298)

Null deviance: 372.48 on 56 degrees of freedom  
Residual deviance: 324.19 on 55 degrees of freedom  
AIC: NA

Number of Fisher Scoring iterations: 4

```
> m3<-glm(N_PI_total ~ Marital_status, family=quasipoisson, data=data)
> summary(m3)
```

Call:

```
glm(formula = N_PI_total ~ Marital_status, family = quasipoisson,
     data = data)
```

Deviance Residuals:

| Min     | 1Q      | Median | 3Q     | Max    |
|---------|---------|--------|--------|--------|
| -4.6182 | -2.1737 | 0.0717 | 1.5509 | 5.2234 |

Coefficients:

|                 | Estimate | Std. Error | t value | Pr(> t )    |
|-----------------|----------|------------|---------|-------------|
| (Intercept)     | 3.57154  | 0.08766    | 40.742  | < 2e-16 *** |
| Marital_statusD | 0.36028  | 0.16262    | 2.216   | 0.03104 *   |
| Marital_statusM | 0.30581  | 0.10994    | 2.782   | 0.00748 **  |
| Marital_statusV | 0.45381  | 0.20458    | 2.218   | 0.03085 *   |

---

Signif. codes: 0 '\*\*\*' 0.001 '\*\*' 0.01 '\*' 0.05 '.' 0.1 ' ' 1

(Dispersion parameter for quasipoisson family taken to be 5.740565)

Null deviance: 372.48 on 56 degrees of freedom  
Residual deviance: 309.93 on 53 degrees of freedom  
AIC: NA

Number of Fisher Scoring iterations: 4

```
> m4<-glm(N_PI_total ~ Level_studies, family=quasipoisson, data=data)
> summary(m4)
```

Call:

```
glm(formula = N_PI_total ~ Level_studies, family = quasipoisson,
     data = data)
```

Deviance Residuals:

| Min     | 1Q      | Median | 3Q     | Max    |
|---------|---------|--------|--------|--------|
| -4.9378 | -1.6280 | 0.1332 | 1.4520 | 5.2932 |

Coefficients:

|                | Estimate | Std. Error | t value | Pr(> t )     |
|----------------|----------|------------|---------|--------------|
| (Intercept)    | 4.03044  | 0.10857    | 37.122  | < 2e-16 ***  |
| Level_studiesP | -0.01556 | 0.13701    | -0.114  | 0.910009     |
| Level_studiesS | -0.12959 | 0.14908    | -0.869  | 0.388624     |
| Level_studiesU | -0.46920 | 0.12782    | -3.671  | 0.000563 *** |

---

Signif. codes: 0 '\*\*\*' 0.001 '\*\*' 0.01 '\*' 0.05 '.' 0.1 ' ' 1

(Dispersion parameter for quasipoisson family taken to be 4.644552)

Null deviance: 372.48 on 56 degrees of freedom  
 Residual deviance: 257.16 on 53 degrees of freedom  
 AIC: NA

Number of Fisher Scoring iterations: 4

```
> m5<-glm(N_PI_total ~ N_House, family=quasipoisson, data=data)
> summary(m5)
```

Call:

```
glm(formula = N_PI_total ~ N_House, family = quasipoisson, data = data)
```

Deviance Residuals:

| Min    | 1Q     | Median | 3Q    | Max   |
|--------|--------|--------|-------|-------|
| -5.219 | -2.441 | -0.419 | 1.964 | 4.757 |

Coefficients:

|             | Estimate | Std. Error | t value | Pr(> t )   |
|-------------|----------|------------|---------|------------|
| (Intercept) | 3.86692  | 0.09360    | 41.314  | <2e-16 *** |
| N_House     | -0.02125 | 0.02231    | -0.953  | 0.345      |

---

Signif. codes: 0 '\*\*\*' 0.001 '\*\*' 0.01 '\*' 0.05 '.' 0.1 ' ' 1

(Dispersion parameter for quasipoisson family taken to be 6.556921)

Null deviance: 372.48 on 56 degrees of freedom  
 Residual deviance: 366.49 on 55 degrees of freedom  
 AIC: NA

Number of Fisher Scoring iterations: 4

```
> m6<-glm(N_PI_total ~ Freq_cooking, family=quasipoisson, data=data)
> summary(m6)
```

Call:

```
glm(formula = N_PI_total ~ Freq_cooking, family = quasipoisson,
    data = data)
```

Deviance Residuals:

| Min     | 1Q      | Median | 3Q     | Max    |
|---------|---------|--------|--------|--------|
| -5.9809 | -1.1778 | 0.2652 | 1.2695 | 3.3163 |

Coefficients:

|              | Estimate | Std. Error | t value | Pr(> t )     |
|--------------|----------|------------|---------|--------------|
| (Intercept)  | 3.428833 | 0.072016   | 47.612  | < 2e-16 ***  |
| Freq_cooking | 0.025847 | 0.004031   | 6.411   | 3.46e-08 *** |

---

Signif. codes: 0 '\*\*\*' 0.001 '\*\*' 0.01 '\*' 0.05 '.' 0.1 ' ' 1

(Dispersion parameter for quasipoisson family taken to be 3.639783)

Null deviance: 372.48 on 56 degrees of freedom  
Residual deviance: 219.78 on 55 degrees of freedom  
AIC: NA

Number of Fisher Scoring iterations: 4

```
> m7<-glm(N_PI_total ~ Freq_cooking_scale, family=quasipoisson, data=data)
> summary(m7)
```

Call:

```
glm(formula = N_PI_total ~ Freq_cooking_scale, family = quasipoisson,
     data = data)
```

Deviance Residuals:

| Min     | 1Q      | Median | 3Q     | Max    |
|---------|---------|--------|--------|--------|
| -5.9412 | -1.2721 | 0.1615 | 1.1683 | 3.3665 |

Coefficients:

|                    | Estimate | Std. Error | t value | Pr(> t )     |
|--------------------|----------|------------|---------|--------------|
| (Intercept)        | 3.34298  | 0.08655    | 38.626  | < 2e-16 ***  |
| Freq_cooking_scale | 0.15555  | 0.02528    | 6.152   | 9.13e-08 *** |

---

Signif. codes: 0 '\*\*\*' 0.001 '\*\*' 0.01 '\*' 0.05 '.' 0.1 ' ' 1

(Dispersion parameter for quasipoisson family taken to be 3.721526)

Null deviance: 372.48 on 56 degrees of freedom  
Residual deviance: 224.89 on 55 degrees of freedom  
AIC: NA

Number of Fisher Scoring iterations: 4

**MEDICINAL ONLY ITEMS**

```
> #####
> m11<-glm(N_PI_Medo ~ Sex, family=quasipoisson, data=data)
> summary(m11)
```

Call:

```
glm(formula = N_PI_Medo ~ Sex, family = quasipoisson, data = data)
```

Deviance Residuals:

| Min     | 1Q      | Median  | 3Q     | Max    |
|---------|---------|---------|--------|--------|
| -4.6260 | -1.9176 | -0.6616 | 0.7750 | 6.8300 |

Coefficients:

|             | Estimate | Std. Error | t value | Pr(> t )     |
|-------------|----------|------------|---------|--------------|
| (Intercept) | 2.3702   | 0.1260     | 18.812  | < 2e-16 ***  |
| SexM        | -0.9125  | 0.2446     | -3.731  | 0.000453 *** |

---

Signif. codes: 0 '\*\*\*' 0.001 '\*\*' 0.01 '\*' 0.05 '.' 0.1 ' ' 1

(Dispersion parameter for quasipoisson family taken to be 5.096046)

Null deviance: 327.20 on 56 degrees of freedom  
 Residual deviance: 247.54 on 55 degrees of freedom  
 AIC: NA

Number of Fisher Scoring iterations: 5

```
> m21<-glm(N_PI_Medo ~ Age, family=quasipoisson, data=data)
> summary(m21)
```

Call:

```
glm(formula = N_PI_Medo ~ Age, family = quasipoisson, data = data)
```

Deviance Residuals:

| Min     | 1Q      | Median  | 3Q     | Max    |
|---------|---------|---------|--------|--------|
| -3.8672 | -1.9166 | -0.1825 | 0.8767 | 5.0302 |

Coefficients:

|             | Estimate | Std. Error | t value | Pr(> t )    |
|-------------|----------|------------|---------|-------------|
| (Intercept) | 1.3163   | 0.3075     | 4.281   | 7.5e-05 *** |
| Age         | 0.3478   | 0.1310     | 2.654   | 0.0104 *    |

---

Signif. codes: 0 '\*\*\*' 0.001 '\*\*' 0.01 '\*' 0.05 '.' 0.1 ' ' 1

(Dispersion parameter for quasipoisson family taken to be 5.166157)

Null deviance: 327.20 on 56 degrees of freedom  
 Residual deviance: 289.88 on 55 degrees of freedom

AIC: NA

Number of Fisher Scoring iterations: 5

```
> m31<-glm(N_PI_Medo ~ Marital_status, family=quasipoisson, data=data)
> summary(m31)
```

Call:

```
glm(formula = N_PI_Medo ~ Marital_status, family = quasipoisson,
     data = data)
```

Deviance Residuals:

| Min     | 1Q      | Median  | 3Q     | Max    |
|---------|---------|---------|--------|--------|
| -3.9628 | -1.9826 | -0.9060 | 0.7358 | 5.7235 |

Coefficients:

|                 | Estimate | Std. Error | t value | Pr(> t )     |
|-----------------|----------|------------|---------|--------------|
| (Intercept)     | 1.8075   | 0.2212     | 8.173   | 5.93e-11 *** |
| Marital_statusD | 0.5279   | 0.3872     | 1.363   | 0.179        |
| Marital_statusM | 0.2532   | 0.2801     | 0.904   | 0.370        |
| Marital_statusV | 0.6492   | 0.4773     | 1.360   | 0.180        |

---

Signif. codes: 0 '\*\*\*' 0.001 '\*\*' 0.01 '\*' 0.05 '.' 0.1 ' ' 1

(Dispersion parameter for quasipoisson family taken to be 6.260978)

Null deviance: 327.20 on 56 degrees of freedom  
Residual deviance: 309.39 on 53 degrees of freedom  
AIC: NA

Number of Fisher Scoring iterations: 5

```
> m41<-glm(N_PI_Medo ~ Level_studies, family=quasipoisson, data=data)
> summary(m41)
```

Call:

```
glm(formula = N_PI_Medo ~ Level_studies, family = quasipoisson,
     data = data)
```

Deviance Residuals:

| Min     | 1Q      | Median  | 3Q     | Max    |
|---------|---------|---------|--------|--------|
| -4.5704 | -1.9836 | -0.4579 | 0.7462 | 6.2336 |

Coefficients:

|                | Estimate | Std. Error | t value | Pr(> t )     |
|----------------|----------|------------|---------|--------------|
| (Intercept)    | 2.1812   | 0.3008     | 7.252   | 1.77e-09 *** |
| Level_studiesP | 0.2014   | 0.3655     | 0.551   | 0.584        |

```
Level_studiesS 0.1648 0.3875 0.425 0.672
Level_studiesU -0.5312 0.3572 -1.487 0.143
```

---

Signif. codes: 0 '\*\*\*' 0.001 '\*\*' 0.01 '\*' 0.05 '.' 0.1 ' ' 1

(Dispersion parameter for quasipoisson family taken to be 5.608339)

Null deviance: 327.20 on 56 degrees of freedom  
Residual deviance: 278.12 on 53 degrees of freedom  
AIC: NA

Number of Fisher Scoring iterations: 5

```
> m51<-glm(N_Pl_Medo ~ N_House, family=quasipoisson, data=data)
> summary(m51)
```

Call:

```
glm(formula = N_Pl_Medo ~ N_House, family = quasipoisson, data = data)
```

Deviance Residuals:

| Min     | 1Q      | Median  | 3Q     | Max    |
|---------|---------|---------|--------|--------|
| -4.3274 | -1.8087 | -0.6975 | 1.0271 | 5.1109 |

Coefficients:

|             | Estimate | Std. Error | t value | Pr(> t )     |
|-------------|----------|------------|---------|--------------|
| (Intercept) | 2.31949  | 0.20274    | 11.441  | 3.62e-16 *** |
| N_House     | -0.08270 | 0.05199    | -1.591  | 0.117        |

---

Signif. codes: 0 '\*\*\*' 0.001 '\*\*' 0.01 '\*' 0.05 '.' 0.1 ' ' 1

(Dispersion parameter for quasipoisson family taken to be 5.802665)

Null deviance: 327.2 on 56 degrees of freedom  
Residual deviance: 312.1 on 55 degrees of freedom  
AIC: NA

Number of Fisher Scoring iterations: 5

```
> m61<-glm(N_Pl_Medo ~ Freq_cooking, family=quasipoisson, data=data)
> summary(m61)
```

Call:

```
glm(formula = N_Pl_Medo ~ Freq_cooking, family = quasipoisson,
    data = data)
```

Deviance Residuals:

| Min | 1Q | Median | 3Q | Max |
|-----|----|--------|----|-----|
|-----|----|--------|----|-----|

-5.1768 -1.6515 -0.1606 0.4289 6.6984

Coefficients:

|              | Estimate | Std. Error | t value | Pr(> t )     |
|--------------|----------|------------|---------|--------------|
| (Intercept)  | 1.41677  | 0.22174    | 6.389   | 3.76e-08 *** |
| Freq_cooking | 0.04209  | 0.01172    | 3.590   | 0.000705 *** |

---

Signif. codes: 0 '\*\*\*' 0.001 '\*\*' 0.01 '\*' 0.05 '.' 0.1 ' ' 1

(Dispersion parameter for quasipoisson family taken to be 4.98261)

Null deviance: 327.20 on 56 degrees of freedom  
Residual deviance: 259.41 on 55 degrees of freedom  
AIC: NA

Number of Fisher Scoring iterations: 5

```
> m71<-glm(N_Pl_Medo ~ Freq_cooking_scale, family=quasipoisson, data=data)
> summary(m71)
```

Call:

```
glm(formula = N_Pl_Medo ~ Freq_cooking_scale, family = quasipoisson,
     data = data)
```

Deviance Residuals:

| Min     | 1Q      | Median  | 3Q     | Max    |
|---------|---------|---------|--------|--------|
| -5.0864 | -1.5740 | -0.2678 | 0.7596 | 6.6661 |

Coefficients:

|                    | Estimate | Std. Error | t value | Pr(> t )     |
|--------------------|----------|------------|---------|--------------|
| (Intercept)        | 1.24935  | 0.26800    | 4.662   | 2.04e-05 *** |
| Freq_cooking_scale | 0.26213  | 0.07452    | 3.518   | 0.000881 *** |

---

Signif. codes: 0 '\*\*\*' 0.001 '\*\*' 0.01 '\*' 0.05 '.' 0.1 ' ' 1

(Dispersion parameter for quasipoisson family taken to be 4.962805)

Null deviance: 327.20 on 56 degrees of freedom  
Residual deviance: 259.51 on 55 degrees of freedom  
AIC: NA

Number of Fisher Scoring iterations: 5

## FOOD ONLY ITEMS

```
> #####
```

```
> m12<-glm(N_Pl_Foodo ~ Sex, family=quasipoisson, data=data)
```



```
> summary(m12)
```

Call:

```
glm(formula = N_PL_Foodo ~ Sex, family = quasipoisson, data = data)
```

Deviance Residuals:

| Min     | 1Q      | Median | 3Q     | Max    |
|---------|---------|--------|--------|--------|
| -2.4883 | -0.7629 | 0.0415 | 0.5439 | 4.1539 |

Coefficients:

|             | Estimate | Std. Error | t value | Pr(> t )   |
|-------------|----------|------------|---------|------------|
| (Intercept) | 3.06495  | 0.04729    | 64.808  | <2e-16 *** |
| SexM        | -0.07852 | 0.07018    | -1.119  | 0.268      |

---

Signif. codes: 0 '\*\*\*' 0.001 '\*\*' 0.01 '\*' 0.05 '.' 0.1 ' ' 1

(Dispersion parameter for quasipoisson family taken to be 1.438153)

Null deviance: 78.580 on 56 degrees of freedom  
Residual deviance: 76.776 on 55 degrees of freedom  
AIC: NA

Number of Fisher Scoring iterations: 4

```
> m22<-glm(N_PL_Foodo ~ Age, family=quasipoisson, data=data)  
> summary(m22)
```

Call:

```
glm(formula = N_PL_Foodo ~ Age, family = quasipoisson, data = data)
```

Deviance Residuals:

| Min     | 1Q      | Median  | 3Q     | Max    |
|---------|---------|---------|--------|--------|
| -2.6069 | -0.8068 | -0.0096 | 0.6160 | 3.6014 |

Coefficients:

|             | Estimate | Std. Error | t value | Pr(> t )   |
|-------------|----------|------------|---------|------------|
| (Intercept) | 2.90507  | 0.08710    | 33.355  | <2e-16 *** |
| Age         | 0.06267  | 0.04022    | 1.558   | 0.125      |

---

Signif. codes: 0 '\*\*\*' 0.001 '\*\*' 0.01 '\*' 0.05 '.' 0.1 ' ' 1

(Dispersion parameter for quasipoisson family taken to be 1.369896)

Null deviance: 78.580 on 56 degrees of freedom  
Residual deviance: 75.256 on 55 degrees of freedom  
AIC: NA

Number of Fisher Scoring iterations: 4

```
> m32<-glm(N_PI_Foodo ~ Marital_status, family=quasipoisson, data=data)
> summary(m32)
```

Call:

```
glm(formula = N_PI_Foodo ~ Marital_status, family = quasipoisson,
     data = data)
```

Deviance Residuals:

| Min     | 1Q      | Median | 3Q     | Max    |
|---------|---------|--------|--------|--------|
| -2.2920 | -0.8348 | 0.0000 | 0.6744 | 3.6654 |

Coefficients:

|                 | Estimate | Std. Error | t value | Pr(> t )   |
|-----------------|----------|------------|---------|------------|
| (Intercept)     | 2.94944  | 0.05943    | 49.628  | <2e-16 *** |
| Marital_statusD | 0.09508  | 0.12154    | 0.782   | 0.438      |
| Marital_statusM | 0.13145  | 0.07708    | 1.705   | 0.094 .    |
| Marital_statusV | 0.09508  | 0.16129    | 0.590   | 0.558      |

---

Signif. codes: 0 '\*\*\*' 0.001 '\*\*' 0.01 '\*' 0.05 '.' 0.1 ' ' 1

(Dispersion parameter for quasipoisson family taken to be 1.416328)

Null deviance: 78.580 on 56 degrees of freedom  
Residual deviance: 74.371 on 53 degrees of freedom  
AIC: NA

Number of Fisher Scoring iterations: 4

```
> m42<-glm(N_PI_Foodo ~ Level_studies, family=quasipoisson, data=data)
> summary(m42)
```

Call:

```
glm(formula = N_PI_Foodo ~ Level_studies, family = quasipoisson,
     data = data)
```

Deviance Residuals:

| Min     | 1Q      | Median  | 3Q     | Max    |
|---------|---------|---------|--------|--------|
| -2.5258 | -0.5999 | -0.0538 | 0.5040 | 4.0450 |

Coefficients:

|                | Estimate | Std. Error | t value | Pr(> t )   |
|----------------|----------|------------|---------|------------|
| (Intercept)    | 3.08453  | 0.09908    | 31.131  | <2e-16 *** |
| Level_studiesP | -0.05601 | 0.12599    | -0.445  | 0.658      |
| Level_studiesS | -0.03473 | 0.13313    | -0.261  | 0.795      |
| Level_studiesU | -0.07680 | 0.11125    | -0.690  | 0.493      |

---

Signif. codes: 0 '\*\*\*' 0.001 '\*\*' 0.01 '\*' 0.05 '.' 0.1 ' ' 1

(Dispersion parameter for quasipoisson family taken to be 1.502087)

Null deviance: 78.580 on 56 degrees of freedom  
Residual deviance: 77.768 on 53 degrees of freedom  
AIC: NA

Number of Fisher Scoring iterations: 4

```
> m52<-glm(N_PI_Foodo ~ N_House, family=quasipoisson, data=data)
> summary(m52)
```

Call:

```
glm(formula = N_PI_Foodo ~ N_House, family = quasipoisson, data = data)
```

Deviance Residuals:

| Min     | 1Q      | Median | 3Q     | Max    |
|---------|---------|--------|--------|--------|
| -2.7407 | -0.6289 | 0.1006 | 0.5882 | 3.8998 |

Coefficients:

|             | Estimate | Std. Error | t value | Pr(> t )   |
|-------------|----------|------------|---------|------------|
| (Intercept) | 2.93865  | 0.06467    | 45.439  | <2e-16 *** |
| N_House     | 0.02431  | 0.01461    | 1.664   | 0.102      |

---

Signif. codes: 0 '\*\*\*' 0.001 '\*\*' 0.01 '\*' 0.05 '.' 0.1 ' ' 1

(Dispersion parameter for quasipoisson family taken to be 1.366589)

Null deviance: 78.580 on 56 degrees of freedom  
Residual deviance: 74.823 on 55 degrees of freedom  
AIC: NA

Number of Fisher Scoring iterations: 4

```
> m62<-glm(N_PI_Foodo ~ Freq_cooking, family=quasipoisson, data=data)
> summary(m62)
```

Call:

```
glm(formula = N_PI_Foodo ~ Freq_cooking, family = quasipoisson,
     data = data)
```

Deviance Residuals:

| Min     | 1Q      | Median  | 3Q     | Max    |
|---------|---------|---------|--------|--------|
| -2.7144 | -0.7130 | -0.0202 | 0.5962 | 4.0995 |

Coefficients:

|              | Estimate | Std. Error | t value | Pr(> t )   |
|--------------|----------|------------|---------|------------|
| (Intercept)  | 2.987628 | 0.059097   | 50.555  | <2e-16 *** |
| Freq_cooking | 0.003153 | 0.003635   | 0.867   | 0.39       |

---

Signif. codes: 0 '\*\*\*' 0.001 '\*\*' 0.01 '\*' 0.05 '.' 0.1 ' ' 1

(Dispersion parameter for quasipoisson family taken to be 1.436085)

Null deviance: 78.580 on 56 degrees of freedom  
Residual deviance: 77.499 on 55 degrees of freedom  
AIC: NA

Number of Fisher Scoring iterations: 4

```
> m72<-glm(N_PI_Foodo ~ Freq_cooking_scale, family=quasipoisson, data=data)
> summary(m72)
```

Call:

```
glm(formula = N_PI_Foodo ~ Freq_cooking_scale, family = quasipoisson,
     data = data)
```

Deviance Residuals:

| Min     | 1Q      | Median  | 3Q     | Max    |
|---------|---------|---------|--------|--------|
| -2.6889 | -0.6852 | -0.0344 | 0.5560 | 4.0671 |

Coefficients:

|                    | Estimate | Std. Error | t value | Pr(> t )   |
|--------------------|----------|------------|---------|------------|
| (Intercept)        | 2.98867  | 0.06884    | 43.415  | <2e-16 *** |
| Freq_cooking_scale | 0.01474  | 0.02178    | 0.677   | 0.501      |

---

Signif. codes: 0 '\*\*\*' 0.001 '\*\*' 0.01 '\*' 0.05 '.' 0.1 ' ' 1

(Dispersion parameter for quasipoisson family taken to be 1.441703)

Null deviance: 78.580 on 56 degrees of freedom  
Residual deviance: 77.917 on 55 degrees of freedom  
AIC: NA

Number of Fisher Scoring iterations: 4

## FOOD-MED ITEMS

```
> #####
```

```
> m13<-glm(N_PI_M.F ~ Sex, family=quasipoisson, data=data)
> summary(m13)
```

Call:

```
glm(formula = N_PL_M.F ~ Sex, family = quasipoisson, data = data)
```

Deviance Residuals:

| Min     | 1Q      | Median  | 3Q     | Max    |
|---------|---------|---------|--------|--------|
| -4.4458 | -1.2725 | -0.0542 | 1.3100 | 3.4141 |

Coefficients:

|             | Estimate | Std. Error | t value | Pr(> t )     |
|-------------|----------|------------|---------|--------------|
| (Intercept) | 3.18910  | 0.06291    | 50.691  | < 2e-16 ***  |
| SexM        | -1.22745 | 0.13771    | -8.913  | 2.91e-12 *** |

---

Signif. codes: 0 '\*\*\*' 0.001 '\*\*' 0.01 '\*' 0.05 '.' 0.1 ' ' 1

(Dispersion parameter for quasipoisson family taken to be 2.881369)

Null deviance: 443.76 on 56 degrees of freedom  
Residual deviance: 164.78 on 55 degrees of freedom  
AIC: NA

Number of Fisher Scoring iterations: 5

```
> m23<-glm(N_PL_M.F ~ Age, family=quasipoisson, data=data)  
> summary(m23)
```

Call:

```
glm(formula = N_PL_M.F ~ Age, family = quasipoisson, data = data)
```

Deviance Residuals:

| Min     | 1Q      | Median | 3Q     | Max    |
|---------|---------|--------|--------|--------|
| -5.6127 | -3.0035 | 0.2822 | 1.7713 | 4.8056 |

Coefficients:

|             | Estimate | Std. Error | t value | Pr(> t )     |
|-------------|----------|------------|---------|--------------|
| (Intercept) | 2.3664   | 0.2274     | 10.408  | 1.31e-14 *** |
| Age         | 0.2053   | 0.1007     | 2.039   | 0.0463 *     |

---

Signif. codes: 0 '\*\*\*' 0.001 '\*\*' 0.01 '\*' 0.05 '.' 0.1 ' ' 1

(Dispersion parameter for quasipoisson family taken to be 6.636641)

Null deviance: 443.76 on 56 degrees of freedom  
Residual deviance: 415.98 on 55 degrees of freedom  
AIC: NA

Number of Fisher Scoring iterations: 5

```
> m33<-glm(N_Pl_M.F ~ Marital_status, family=quasipoisson, data=data)
> summary(m33)
```

Call:

```
glm(formula = N_Pl_M.F ~ Marital_status, family = quasipoisson,
    data = data)
```

Deviance Residuals:

| Min     | 1Q      | Median  | 3Q     | Max    |
|---------|---------|---------|--------|--------|
| -5.4101 | -2.7658 | -0.1296 | 1.9311 | 4.1290 |

Coefficients:

|                 | Estimate | Std. Error | t value | Pr(> t )   |
|-----------------|----------|------------|---------|------------|
| (Intercept)     | 2.3979   | 0.1670     | 14.359  | <2e-16 *** |
| Marital_statusD | 0.5810   | 0.2872     | 2.023   | 0.0481 *   |
| Marital_statusM | 0.5229   | 0.2019     | 2.590   | 0.0124 *   |
| Marital_statusV | 0.7520   | 0.3463     | 2.172   | 0.0344 *   |

---

Signif. codes: 0 '\*\*\*' 0.001 '\*\*' 0.01 '\*' 0.05 '.' 0.1 ' ' 1

(Dispersion parameter for quasipoisson family taken to be 6.441917)

Null deviance: 443.76 on 56 degrees of freedom  
Residual deviance: 382.94 on 53 degrees of freedom  
AIC: NA

Number of Fisher Scoring iterations: 5

```
> m43<-glm(N_Pl_M.F ~ Level_studies, family=quasipoisson, data=data)
> summary(m43)
```

Call:

```
glm(formula = N_Pl_M.F ~ Level_studies, family = quasipoisson,
    data = data)
```

Deviance Residuals:

| Min     | 1Q      | Median | 3Q     | Max    |
|---------|---------|--------|--------|--------|
| -4.7973 | -1.8104 | 0.2451 | 1.4944 | 4.3524 |

Coefficients:

|                | Estimate | Std. Error | t value | Pr(> t )     |
|----------------|----------|------------|---------|--------------|
| (Intercept)    | 3.2246   | 0.1689     | 19.091  | < 2e-16 ***  |
| Level_studiesP | -0.0500  | 0.2145     | -0.233  | 0.817        |
| Level_studiesS | -0.3404  | 0.2444     | -1.393  | 0.169        |
| Level_studiesU | -0.9015  | 0.2133     | -4.227  | 9.39e-05 *** |

---

Signif. codes: 0 '\*\*\*' 0.001 '\*\*' 0.01 '\*' 0.05 '.' 0.1 ' ' 1

(Dispersion parameter for quasipoisson family taken to be 5.021117)

Null deviance: 443.76 on 56 degrees of freedom  
Residual deviance: 300.17 on 53 degrees of freedom  
AIC: NA

Number of Fisher Scoring iterations: 5

```
> m53<-glm(N_PI_M.F ~ N_House, family=quasipoisson, data=data)
> summary(m53)
```

Call:

```
glm(formula = N_PI_M.F ~ N_House, family = quasipoisson, data = data)
```

Deviance Residuals:

| Min     | 1Q      | Median | 3Q     | Max    |
|---------|---------|--------|--------|--------|
| -4.9387 | -2.7580 | 0.0477 | 1.9618 | 4.9504 |

Coefficients:

|             | Estimate | Std. Error | t value | Pr(> t )   |
|-------------|----------|------------|---------|------------|
| (Intercept) | 2.98506  | 0.15596    | 19.140  | <2e-16 *** |
| N_House     | -0.05857 | 0.03885    | -1.507  | 0.137      |

---

Signif. codes: 0 '\*\*\*' 0.001 '\*\*' 0.01 '\*' 0.05 '.' 0.1 ' ' 1

(Dispersion parameter for quasipoisson family taken to be 6.991719)

Null deviance: 443.76 on 56 degrees of freedom  
Residual deviance: 427.56 on 55 degrees of freedom  
AIC: NA

Number of Fisher Scoring iterations: 5

```
> m63<-glm(N_PI_M.F ~ Freq_cooking, family=quasipoisson, data=data)
> summary(m63)
```

Call:

```
glm(formula = N_PI_M.F ~ Freq_cooking, family = quasipoisson,
    data = data)
```

Deviance Residuals:

| Min     | 1Q      | Median | 3Q     | Max    |
|---------|---------|--------|--------|--------|
| -5.4165 | -1.4089 | 0.0632 | 1.1045 | 4.0638 |

Coefficients:

|  | Estimate | Std. Error | t value | Pr(> t ) |
|--|----------|------------|---------|----------|
|--|----------|------------|---------|----------|

```
(Intercept) 2.08669 0.14428 14.463 < 2e-16 ***
Freq_cooking 0.04653 0.00752 6.188 7.99e-08 ***
---
Signif. codes: 0 '***' 0.001 '**' 0.01 '*' 0.05 '.' 0.1 ' ' 1
```

(Dispersion parameter for quasipoisson family taken to be 4.216711)

Null deviance: 443.76 on 56 degrees of freedom  
 Residual deviance: 271.32 on 55 degrees of freedom  
 AIC: NA

Number of Fisher Scoring iterations: 5

```
> m73<-glm(N_PL_M.F ~ Freq_cooking_scale, family=quasipoisson, data=data)
> summary(m73)
```

Call:  
 glm(formula = N\_PL\_M.F ~ Freq\_cooking\_scale, family = quasipoisson,  
 data = data)

Deviance Residuals:

| Min     | 1Q      | Median | 3Q     | Max    |
|---------|---------|--------|--------|--------|
| -5.4160 | -1.0919 | 0.1549 | 0.9749 | 3.9201 |

Coefficients:

|                    | Estimate | Std. Error | t value | Pr(> t )     |
|--------------------|----------|------------|---------|--------------|
| (Intercept)        | 1.88679  | 0.17562    | 10.743  | 4.02e-15 *** |
| Freq_cooking_scale | 0.29424  | 0.04819    | 6.106   | 1.09e-07 *** |

---  
 Signif. codes: 0 '\*\*\*' 0.001 '\*\*' 0.01 '\*' 0.05 '.' 0.1 ' ' 1

(Dispersion parameter for quasipoisson family taken to be 4.195222)

Null deviance: 443.76 on 56 degrees of freedom  
 Residual deviance: 268.33 on 55 degrees of freedom  
 AIC: NA

Number of Fisher Scoring iterations: 5

## MEDICINAL ITEMS

```
> #####
> m14<-glm(N_PL_Med ~ Sex, family=quasipoisson, data=data)
> summary(m14)
```

Call:  
 glm(formula = N\_PL\_Med ~ Sex, family = quasipoisson, data = data)



Deviance Residuals:

| Min     | 1Q      | Median  | 3Q     | Max    |
|---------|---------|---------|--------|--------|
| -5.5449 | -2.1370 | -0.3803 | 1.4213 | 6.3797 |

Coefficients:

|             | Estimate | Std. Error | t value | Pr(> t )     |
|-------------|----------|------------|---------|--------------|
| (Intercept) | 3.56199  | 0.07197    | 49.493  | < 2e-16 ***  |
| SexM        | -1.12773 | 0.15151    | -7.443  | 7.08e-10 *** |

---

Signif. codes: 0 '\*\*\*' 0.001 '\*\*' 0.01 '\*' 0.05 '.' 0.1 ' ' 1

(Dispersion parameter for quasipoisson family taken to be 5.474777)

Null deviance: 656.77 on 56 degrees of freedom  
Residual deviance: 297.30 on 55 degrees of freedom  
AIC: NA

Number of Fisher Scoring iterations: 5

```
> m24<-glm(N_Pl_Med ~ Age, family=quasipoisson, data=data)
> summary(m24)
```

Call:

glm(formula = N\_Pl\_Med ~ Age, family = quasipoisson, data = data)

Deviance Residuals:

| Min     | 1Q      | Median | 3Q     | Max    |
|---------|---------|--------|--------|--------|
| -6.4037 | -3.3865 | 0.5723 | 2.2994 | 4.8553 |

Coefficients:

|             | Estimate | Std. Error | t value | Pr(> t )   |
|-------------|----------|------------|---------|------------|
| (Intercept) | 2.6673   | 0.2259     | 11.809  | <2e-16 *** |
| Age         | 0.2497   | 0.0988     | 2.527   | 0.0144 *   |

---

Signif. codes: 0 '\*\*\*' 0.001 '\*\*' 0.01 '\*' 0.05 '.' 0.1 ' ' 1

(Dispersion parameter for quasipoisson family taken to be 9.407502)

Null deviance: 656.77 on 56 degrees of freedom  
Residual deviance: 596.04 on 55 degrees of freedom  
AIC: NA

Number of Fisher Scoring iterations: 5

```
> m34<-glm(N_Pl_Med ~ Marital_status, family=quasipoisson, data=data)
> summary(m34)
```

Call:  
glm(formula = N\_PL\_Med ~ Marital\_status, family = quasipoisson,  
data = data)

Deviance Residuals:

| Min     | 1Q      | Median  | 3Q     | Max    |
|---------|---------|---------|--------|--------|
| -5.8277 | -3.4881 | -0.5573 | 2.3882 | 6.0513 |

Coefficients:

|                 | Estimate | Std. Error | t value | Pr(> t )   |
|-----------------|----------|------------|---------|------------|
| (Intercept)     | 2.8499   | 0.1674     | 17.021  | <2e-16 *** |
| Marital_statusD | 0.5513   | 0.2908     | 1.896   | 0.0634 .   |
| Marital_statusM | 0.4280   | 0.2055     | 2.082   | 0.0422 *   |
| Marital_statusV | 0.7149   | 0.3522     | 2.030   | 0.0474 *   |

---

Signif. codes: 0 '\*\*\*' 0.001 '\*\*' 0.01 '\*' 0.05 '.' 0.1 ' ' 1

(Dispersion parameter for quasipoisson family taken to be 10.17578)

Null deviance: 656.77 on 56 degrees of freedom  
Residual deviance: 583.80 on 53 degrees of freedom  
AIC: NA

Number of Fisher Scoring iterations: 5

```
> m44<-glm(N_PL_Med ~ Level_studies, family=quasipoisson, data=data)  
> summary(m44)
```

Call:  
glm(formula = N\_PL\_Med ~ Level\_studies, family = quasipoisson,  
data = data)

Deviance Residuals:

| Min     | 1Q      | Median  | 3Q     | Max    |
|---------|---------|---------|--------|--------|
| -6.4856 | -2.5584 | -0.2452 | 1.6181 | 6.6020 |

Coefficients:

|                | Estimate | Std. Error | t value | Pr(> t )     |
|----------------|----------|------------|---------|--------------|
| (Intercept)    | 3.53889  | 0.18367    | 19.268  | < 2e-16 ***  |
| Level_studiesP | 0.01646  | 0.23042    | 0.071   | 0.943316     |
| Level_studiesS | -0.19485 | 0.25616    | -0.761  | 0.450238     |
| Level_studiesU | -0.79916 | 0.22769    | -3.510  | 0.000924 *** |

---

Signif. codes: 0 '\*\*\*' 0.001 '\*\*' 0.01 '\*' 0.05 '.' 0.1 ' ' 1

(Dispersion parameter for quasipoisson family taken to be 8.130141)

Null deviance: 656.77 on 56 degrees of freedom  
Residual deviance: 468.89 on 53 degrees of freedom  
AIC: NA

Number of Fisher Scoring iterations: 5

```
> m54<-glm(N_PI_Med ~ N_House, family=quasipoisson, data=data)
> summary(m54)
```

Call:

```
glm(formula = N_PI_Med ~ N_House, family = quasipoisson, data = data)
```

Deviance Residuals:

| Min     | 1Q      | Median  | 3Q     | Max    |
|---------|---------|---------|--------|--------|
| -6.4540 | -2.8377 | -0.1433 | 2.2733 | 5.9247 |

Coefficients:

|             | Estimate | Std. Error | t value | Pr(> t )   |
|-------------|----------|------------|---------|------------|
| (Intercept) | 3.40139  | 0.15486    | 21.965  | <2e-16 *** |
| N_House     | -0.06515 | 0.03889    | -1.675  | 0.0995 .   |

---

Signif. codes: 0 '\*\*\*' 0.001 '\*\*' 0.01 '\*' 0.05 '.' 0.1 ' ' 1

(Dispersion parameter for quasipoisson family taken to be 10.32178)

Null deviance: 656.77 on 56 degrees of freedom  
Residual deviance: 627.17 on 55 degrees of freedom  
AIC: NA

Number of Fisher Scoring iterations: 5

```
> m64<-glm(N_PI_Med ~ Freq_cooking, family=quasipoisson, data=data)
> summary(m64)
```

Call:

```
glm(formula = N_PI_Med ~ Freq_cooking, family = quasipoisson,
    data = data)
```

Deviance Residuals:

| Min    | 1Q     | Median | 3Q    | Max   |
|--------|--------|--------|-------|-------|
| -6.222 | -1.965 | 0.182  | 1.916 | 5.690 |

Coefficients:

|              | Estimate | Std. Error | t value | Pr(> t )    |
|--------------|----------|------------|---------|-------------|
| (Intercept)  | 2.499484 | 0.146585   | 17.051  | < 2e-16 *** |
| Freq_cooking | 0.045453 | 0.007667   | 5.929   | 2.1e-07 *** |

---

Signif. codes: 0 '\*\*\*' 0.001 '\*\*' 0.01 '\*' 0.05 '.' 0.1 ' ' 1

(Dispersion parameter for quasipoisson family taken to be 6.540387)

Null deviance: 656.77 on 56 degrees of freedom  
Residual deviance: 411.96 on 55 degrees of freedom  
AIC: NA

Number of Fisher Scoring iterations: 5

```
> m74<-glm(N_PI_Med ~ Freq_cooking_scale, family=quasipoisson, data=data)
> summary(m74)
```

Call:

```
glm(formula = N_PI_Med ~ Freq_cooking_scale, family = quasipoisson,
     data = data)
```

Deviance Residuals:

| Min    | 1Q     | Median | 3Q    | Max   |
|--------|--------|--------|-------|-------|
| -6.218 | -1.469 | 0.248  | 1.599 | 5.670 |

Coefficients:

|                    | Estimate | Std. Error | t value | Pr(> t )     |
|--------------------|----------|------------|---------|--------------|
| (Intercept)        | 2.30878  | 0.17792    | 12.98   | < 2e-16 ***  |
| Freq_cooking_scale | 0.28606  | 0.04898    | 5.84    | 2.91e-07 *** |

---

Signif. codes: 0 '\*\*\*' 0.001 '\*\*' 0.01 '\*' 0.05 '.' 0.1 ' ' 1

(Dispersion parameter for quasipoisson family taken to be 6.498579)

Null deviance: 656.77 on 56 degrees of freedom  
Residual deviance: 409.28 on 55 degrees of freedom  
AIC: NA

Number of Fisher Scoring iterations: 5

## FOOD ITEMS

```
> #####
```

```
> m15<-glm(N_PI_Food ~ Sex, family=quasipoisson, data=data)
> summary(m15)
```

Call:

```
glm(formula = N_PI_Food ~ Sex, family = quasipoisson, data = data)
```

Deviance Residuals:

|  | Min     | 1Q      | Median | 3Q     | Max    |
|--|---------|---------|--------|--------|--------|
|  | -3.2053 | -1.0505 | 0.0098 | 0.9493 | 3.4950 |

Coefficients:

|             | Estimate | Std. Error | t value | Pr(> t )     |
|-------------|----------|------------|---------|--------------|
| (Intercept) | 3.82719  | 0.03693    | 103.6   | < 2e-16 ***  |
| SexM        | -0.53410 | 0.06283    | -8.5    | 1.34e-11 *** |

---

Signif. codes: 0 '\*\*\*' 0.001 '\*\*' 0.01 '\*' 0.05 '.' 0.1 ' ' 1

(Dispersion parameter for quasipoisson family taken to be 1.878896)

Null deviance: 246.20 on 56 degrees of freedom  
Residual deviance: 104.28 on 55 degrees of freedom  
AIC: NA

Number of Fisher Scoring iterations: 4

```
> m25<-glm(N_PI_Food ~ Age, family=quasipoisson, data=data)
> summary(m25)
```

Call:

```
glm(formula = N_PI_Food ~ Age, family = quasipoisson, data = data)
```

Deviance Residuals:

|  | Min    | 1Q     | Median | 3Q    | Max   |
|--|--------|--------|--------|-------|-------|
|  | -4.792 | -1.585 | -0.110 | 1.431 | 3.709 |

Coefficients:

|             | Estimate | Std. Error | t value | Pr(> t )   |
|-------------|----------|------------|---------|------------|
| (Intercept) | 3.36023  | 0.11170    | 30.083  | <2e-16 *** |
| Age         | 0.12488  | 0.05063    | 2.467   | 0.0168 *   |

---

Signif. codes: 0 '\*\*\*' 0.001 '\*\*' 0.01 '\*' 0.05 '.' 0.1 ' ' 1

(Dispersion parameter for quasipoisson family taken to be 3.872409)

Null deviance: 246.20 on 56 degrees of freedom  
Residual deviance: 222.62 on 55 degrees of freedom  
AIC: NA

Number of Fisher Scoring iterations: 4

```
> m35<-glm(N_PI_Food ~ Marital_status, family=quasipoisson, data=data)
> summary(m35)
```

Call:

```
glm(formula = N_Pl_Food ~ Marital_status, family = quasipoisson,  
    data = data)
```

Deviance Residuals:

| Min     | 1Q      | Median | 3Q     | Max    |
|---------|---------|--------|--------|--------|
| -3.7657 | -1.3786 | 0.1293 | 1.2623 | 3.6787 |

Coefficients:

|                 | Estimate | Std. Error | t value | Pr(> t )    |
|-----------------|----------|------------|---------|-------------|
| (Intercept)     | 3.41068  | 0.07637    | 44.658  | < 2e-16 *** |
| Marital_statusD | 0.29473  | 0.14504    | 2.032   | 0.04717 *   |
| Marital_statusM | 0.28925  | 0.09607    | 3.011   | 0.00399 **  |
| Marital_statusV | 0.38106  | 0.18365    | 2.075   | 0.04286 *   |

---

Signif. codes: 0 '\*\*\*' 0.001 '\*\*' 0.01 '\*' 0.05 '.' 0.1 ' ' 1

(Dispersion parameter for quasipoisson family taken to be 3.709786)

Null deviance: 246.20 on 56 degrees of freedom  
Residual deviance: 204.31 on 53 degrees of freedom  
AIC: NA

Number of Fisher Scoring iterations: 4

```
> m45<-glm(N_Pl_Food ~ Level_studies, family=quasipoisson, data=data)  
> summary(m45)
```

Call:

```
glm(formula = N_Pl_Food ~ Level_studies, family = quasipoisson,  
    data = data)
```

Deviance Residuals:

| Min     | 1Q      | Median | 3Q     | Max    |
|---------|---------|--------|--------|--------|
| -4.1465 | -1.0374 | 0.1985 | 1.0691 | 3.5232 |

Coefficients:

|                | Estimate | Std. Error | t value | Pr(> t )     |
|----------------|----------|------------|---------|--------------|
| (Intercept)    | 3.85922  | 0.09723    | 39.693  | < 2e-16 ***  |
| Level_studiesP | -0.06000 | 0.12373    | -0.485  | 0.629732     |
| Level_studiesS | -0.19566 | 0.13563    | -1.443  | 0.154997     |
| Level_studiesU | -0.43980 | 0.11400    | -3.858  | 0.000312 *** |

---

Signif. codes: 0 '\*\*\*' 0.001 '\*\*' 0.01 '\*' 0.05 '.' 0.1 ' ' 1

(Dispersion parameter for quasipoisson family taken to be 3.138394)

Null deviance: 246.20 on 56 degrees of freedom

Residual deviance: 173.84 on 53 degrees of freedom  
AIC: NA

Number of Fisher Scoring iterations: 4

```
> m55<-glm(N_Pl_Food ~ N_House, family=quasipoisson, data=data)
> summary(m55)
```

Call:

```
glm(formula = N_Pl_Food ~ N_House, family = quasipoisson, data = data)
```

Deviance Residuals:

| Min     | 1Q      | Median  | 3Q     | Max    |
|---------|---------|---------|--------|--------|
| -4.2399 | -1.6850 | -0.2971 | 1.6137 | 4.3277 |

Coefficients:

|             | Estimate  | Std. Error | t value | Pr(> t )   |
|-------------|-----------|------------|---------|------------|
| (Intercept) | 3.644418  | 0.084316   | 43.223  | <2e-16 *** |
| N_House     | -0.009818 | 0.019826   | -0.495  | 0.622      |

---

Signif. codes: 0 '\*\*\*' 0.001 '\*\*' 0.01 '\*' 0.05 '.' 0.1 ' ' 1

(Dispersion parameter for quasipoisson family taken to be 4.363365)

Null deviance: 246.20 on 56 degrees of freedom  
Residual deviance: 245.13 on 55 degrees of freedom  
AIC: NA

Number of Fisher Scoring iterations: 4

```
> m65<-glm(N_Pl_Food ~ Freq_cooking, family=quasipoisson, data=data)
> summary(m65)
```

Call:

```
glm(formula = N_Pl_Food ~ Freq_cooking, family = quasipoisson,
    data = data)
```

Deviance Residuals:

| Min     | 1Q      | Median | 3Q     | Max    |
|---------|---------|--------|--------|--------|
| -4.9622 | -1.1048 | 0.1264 | 1.0477 | 3.0266 |

Coefficients:

|              | Estimate | Std. Error | t value | Pr(> t )     |
|--------------|----------|------------|---------|--------------|
| (Intercept)  | 3.308415 | 0.065168   | 50.768  | < 2e-16 ***  |
| Freq_cooking | 0.021746 | 0.003706   | 5.868   | 2.63e-07 *** |

---

Signif. codes: 0 '\*\*\*' 0.001 '\*\*' 0.01 '\*' 0.05 '.' 0.1 ' ' 1

(Dispersion parameter for quasipoisson family taken to be 2.595218)

Null deviance: 246.20 on 56 degrees of freedom  
Residual deviance: 155.56 on 55 degrees of freedom  
AIC: NA

Number of Fisher Scoring iterations: 4

```
> m75<-glm(N_PI_Food ~ Freq_cooking_scale, family=quasipoisson, data=data)
> summary(m75)
```

Call:  
glm(formula = N\_PI\_Food ~ Freq\_cooking\_scale, family = quasipoisson,  
data = data)

Deviance Residuals:

| Min     | 1Q      | Median | 3Q     | Max    |
|---------|---------|--------|--------|--------|
| -4.9237 | -0.9254 | 0.1711 | 1.2313 | 3.0511 |

Coefficients:

|                    | Estimate | Std. Error | t value | Pr(> t )     |
|--------------------|----------|------------|---------|--------------|
| (Intercept)        | 3.23989  | 0.07820    | 41.429  | < 2e-16 ***  |
| Freq_cooking_scale | 0.12960  | 0.02315    | 5.597   | 7.13e-07 *** |

---

Signif. codes: 0 '\*\*\*' 0.001 '\*\*' 0.01 '\*' 0.05 '.' 0.1 ' ' 1

(Dispersion parameter for quasipoisson family taken to be 2.667862)

Null deviance: 246.20 on 56 degrees of freedom  
Residual deviance: 159.52 on 55 degrees of freedom  
AIC: NA

Number of Fisher Scoring iterations: 4

## BONFERRONI ADJUSTED P VALUES

```
[1] 7.5680e-11 5.3240e-02 3.4144e-01 8.2280e-02 3.3935e-01 1.0000e+00 1.0000e+00
[8] 6.1930e-03 1.0000e+00 3.8060e-07 1.0043e-06
```

```
[1] 0.004983 0.114400 1.000000 1.000000 1.000000 1.000000 1.000000 1.000000 1.000000
[10] 0.007755 0.009691
```



```
[1] 1 1 1 1 1 1 1 1 1 1
```

```
[1] 3.2010e-11 5.0930e-01 5.2910e-01 1.3640e-01 3.7840e-01 1.0000e+00 1.0000e+00  
[8] 1.0329e-03 1.0000e+00 8.7890e-07 1.1990e-06
```

```
[1] 7.7880e-09 1.5840e-01 6.9740e-01 4.6420e-01 5.2140e-01 1.0000e+00 1.0000e+00  
[8] 1.0164e-02 1.0000e+00 2.3100e-06 3.2010e-06
```

```
[1] 1.4740e-10 1.8480e-01 5.1887e-01 4.3890e-02 4.7146e-01 1.0000e+00 1.0000e+00  
[8] 3.4320e-03 1.0000e+00 2.8930e-06 7.8430e-06
```

### MODEL WITH INTERACTIONS

```
> model1 <- glm(N_PI_total ~ Sex * Freq_cooking, family=quasipoisson, data=data)  
> summary(model1)
```

Call:

```
glm(formula = N_PI_total ~ Sex * Freq_cooking, family = quasipoisson,  
     data = data)
```

Deviance Residuals:

```
      Min       1Q   Median       3Q      Max  
-4.3759 -0.8626  0.1052  0.5373  3.2488
```

Coefficients:

```
              Estimate Std. Error t value Pr(>|t|)  
(Intercept)    3.588038   0.119516  30.021 < 2e-16 ***  
SexM            -0.064729   0.134305  -0.482  0.631824  
Freq_cooking     0.022439   0.005629   3.986  0.000207 ***  
SexM:Freq_cooking -0.042147   0.009751  -4.322  6.84e-05 ***
```

---

Signif. codes: 0 '\*\*\*' 0.001 '\*\*' 0.01 '\*' 0.05 '.' 0.1 ' ' 1

(Dispersion parameter for quasipoisson family taken to be 1.989494)

```
Null deviance: 372.48 on 56 degrees of freedom  
Residual deviance: 107.25 on 53 degrees of freedom  
AIC: NA
```

Number of Fisher Scoring iterations: 4

```
> model2 <- glm(N_PI_Medo ~ Sex * Freq_cooking, family=quasipoisson, data=data)  
> summary(model2)
```

Call:

```
glm(formula = N_PI_Medo ~ Sex * Freq_cooking, family = quasipoisson,
     data = data)
```

Deviance Residuals:

| Min     | 1Q      | Median  | 3Q     | Max    |
|---------|---------|---------|--------|--------|
| -5.4888 | -1.1647 | -0.3871 | 0.2883 | 6.5221 |

Coefficients:

|                   | Estimate | Std. Error | t value | Pr(> t )  |
|-------------------|----------|------------|---------|-----------|
| (Intercept)       | 1.46523  | 0.44818    | 3.269   | 0.0019 ** |
| SexM              | 0.16774  | 0.50932    | 0.329   | 0.7432    |
| Freq_cooking      | 0.04454  | 0.02047    | 2.176   | 0.0341 *  |
| SexM:Freq_cooking | -0.08196 | 0.04064    | -2.017  | 0.0488 *  |

---

Signif. codes: 0 '\*\*\*' 0.001 '\*\*' 0.01 '\*' 0.05 '.' 0.1 ' ' 1

(Dispersion parameter for quasipoisson family taken to be 4.49344)

Null deviance: 327.20 on 56 degrees of freedom  
Residual deviance: 218.88 on 53 degrees of freedom  
AIC: NA

Number of Fisher Scoring iterations: 5

```
> model3 <- glm(N_PI_Foodo ~ Sex * Freq_cooking, family=quasipoisson, data=data)
> summary(model3)
```

Call:

```
glm(formula = N_PI_Foodo ~ Sex * Freq_cooking, family = quasipoisson,
     data = data)
```

Deviance Residuals:

| Min     | 1Q      | Median  | 3Q     | Max    |
|---------|---------|---------|--------|--------|
| -2.5501 | -0.8335 | -0.0241 | 0.6554 | 4.0143 |

Coefficients:

|                   | Estimate  | Std. Error | t value | Pr(> t )   |
|-------------------|-----------|------------|---------|------------|
| (Intercept)       | 2.825770  | 0.154552   | 18.284  | <2e-16 *** |
| SexM              | 0.225661  | 0.167159   | 1.350   | 0.1828     |
| Freq_cooking      | 0.012134  | 0.007395   | 1.641   | 0.1067     |
| SexM:Freq_cooking | -0.024714 | 0.010835   | -2.281  | 0.0266 *   |

---

Signif. codes: 0 '\*\*\*' 0.001 '\*\*' 0.01 '\*' 0.05 '.' 0.1 ' ' 1

(Dispersion parameter for quasipoisson family taken to be 1.36394)

Null deviance: 78.580 on 56 degrees of freedom

Residual deviance: 69.451 on 53 degrees of freedom

AIC: NA

Number of Fisher Scoring iterations: 4

```
> model4 <- glm(N_PI_M.F ~ Sex * Freq_cooking, family=quasipoisson, data=data)
> summary(model4)
```

Call:

```
glm(formula = N_PI_M.F ~ Sex * Freq_cooking, family = quasipoisson,
     data = data)
```

Deviance Residuals:

| Min    | 1Q     | Median | 3Q    | Max   |
|--------|--------|--------|-------|-------|
| -4.548 | -1.230 | -0.173 | 1.034 | 3.084 |

Coefficients:

|                   | Estimate  | Std. Error | t value | Pr(> t )    |
|-------------------|-----------|------------|---------|-------------|
| (Intercept)       | 2.732563  | 0.202852   | 13.471  | < 2e-16 *** |
| SexM              | -0.592591 | 0.245803   | -2.411  | 0.01942 *   |
| Freq_cooking      | 0.022919  | 0.009548   | 2.400   | 0.01992 *   |
| SexM:Freq_cooking | -0.061120 | 0.022378   | -2.731  | 0.00855 **  |

---

Signif. codes: 0 '\*\*\*' 0.001 '\*\*' 0.01 '\*' 0.05 '.' 0.1 ' ' 1

(Dispersion parameter for quasipoisson family taken to be 2.451249)

Null deviance: 443.76 on 56 degrees of freedom

Residual deviance: 140.13 on 53 degrees of freedom

AIC: NA

Number of Fisher Scoring iterations: 5

```
> model5 <- glm(N_PI_Med ~ Sex * Freq_cooking, family=quasipoisson, data=data)
> summary(model5)
```

Call:

```
glm(formula = N_PI_Med ~ Sex * Freq_cooking, family = quasipoisson,
     data = data)
```

Deviance Residuals:

| Min     | 1Q      | Median  | 3Q     | Max    |
|---------|---------|---------|--------|--------|
| -5.6842 | -1.2467 | -0.0443 | 1.0902 | 5.9354 |

Coefficients:

|             | Estimate | Std. Error | t value | Pr(> t )    |
|-------------|----------|------------|---------|-------------|
| (Intercept) | 2.96907  | 0.23640    | 12.559  | < 2e-16 *** |

```

SexM      -0.35766  0.28005 -1.277 0.20712
Freq_cooking  0.02958  0.01102  2.684 0.00968 **
SexM:Freq_cooking -0.06749  0.02447 -2.758 0.00797 **
---
Signif. codes:  0 '***' 0.001 '**' 0.01 '*' 0.05 '.' 0.1 ' ' 1

```

(Dispersion parameter for quasipoisson family taken to be 4.597758)

```

Null deviance: 656.77 on 56 degrees of freedom
Residual deviance: 246.77 on 53 degrees of freedom
AIC: NA

```

Number of Fisher Scoring iterations: 5

```

> model6 <- glm(N_PI_Food ~ Sex * Freq_cooking, family=quasipoisson, data=data)
> summary(model6)

```

```

Call:
glm(formula = N_PI_Food ~ Sex * Freq_cooking, family = quasipoisson,
    data = data)

```

```

Deviance Residuals:
    Min       1Q   Median       3Q      Max
-3.3368 -0.7686 -0.0944  0.7440  3.2745

```

```

Coefficients:
            Estimate Std. Error t value Pr(>|t|)
(Intercept)   3.472212   0.110727  31.358 < 2e-16 ***
SexM          -0.084787   0.123923  -0.684 0.496834
Freq_cooking   0.017907   0.005251   3.410 0.001248 **
SexM:Freq_cooking -0.036625  0.008901  -4.115 0.000136 ***
---
Signif. codes:  0 '***' 0.001 '**' 0.01 '*' 0.05 '.' 0.1 ' ' 1

```

(Dispersion parameter for quasipoisson family taken to be 1.435891)

```

Null deviance: 246.202 on 56 degrees of freedom
Residual deviance: 76.758 on 53 degrees of freedom
AIC: NA

```

Number of Fisher Scoring iterations: 4
