# Supplementary material for: Medicines in the Kitchen: Gender Roles Shape Ethnobotanical Knowledge in Marrakshi Households
Source: MDPI journal article supplement (doi:10.3390/foods10102332), 2021-09-30
Supplement: s1 [file s1]

## ESM 2. Interview template

### Investigation sheet Knowledge of medicinal and food plants in Marrakech

#### General framework :

Women in Muslim countries are more familiar with medicinal plants as they mainly care for children and the elderly in the family, but men also have deep knowledge about plants in this and other areas. Given that the use of plants is rooted in the pharmacopoeia, gastronomy, and Moroccan craftsmanship in general and in the daily life of Marrakchis in particular, this survey aims to contribute to the enhancement of the use and knowledge useful plants in the homes of Marrakchis by comparing this knowledge between men and women of different age categories and social status.

#### Consent :

The present study will be the subject of a scientific publication which aims to study the knowledge of medicinal plants in the kitchens of Marrakech.

You are cordially invited to participate in this survey, your participation in this research project is completely voluntary, you have the right not to answer any question. You can also ask for more information about the project and the type of question before accepting to participate.

---

#### Part 1 : Description of the participant

---

**Code :** .....

**Gender :** Female ☐ Male ☐ I do not wish to specify ☐

**Age :** 30-39 ☐ 40-49 ☐ 50-59 ☐

**Family situation :** Single ☐ Married ☐ Divorced ☐ Widowed ☐

**Level of study :** None ☐ Primary ☐ Secondary ☐ University ☐

**Profession :** .....  
.....

**Number of family members in the household (total) :** ... ..

**Workforce / Gender :** Female : .....; Male :.... ..

**Workforce / Age groups :**

**<10 years** :.... .; **10-20** :....; **20-30** :....; **30-40** :.... ; **40-50** :... ; **50-60** :.... ; **> 60** :....

**Life course :** .....

.....  
.....  
.....  
.....  
.....  
.....  
.....  
.....  
.....  
.....  
.....  
.....  
.....  
.....  
.....

**Neighbourhood :**

.....

**Origin:** Amazigh ☐ Arabic ☐ Amazigh / Arabic ☐

**Languages :** Tamazight ☐ Arabic ☐ French ☐ English ☐ Spanish ☐

---

**Part 2: Use of plants**

---

**Q 1 - What plants do you use in your life?**

|      |      |
|------|------|
| 1 /  | 17 / |
| 2 /  | 18 / |
| 3 /  | 19 / |
| 4 /  | 20 / |
| 5 /  | 21 / |
| 6 /  | 22 / |
| 7 /  | 23 / |
| 8 /  | 24 / |
| 9 /  | 25 / |
| 10 / | 26 / |
| 11 / | 27 / |
| 12 / | 28 / |
| 13 / | 29 / |
| 14 / | 30 / |
| 15 / | 31 / |
| 16 / | 32 / |

**Q 1-1 - What do you use them for ?**

| <b>Plant number</b> | <b>Use</b> (Tagine, salad, desserts, making baskets , carpentry, medicine gold, etc.) |
|---------------------|---------------------------------------------------------------------------------------|
| 1                   |                                                                                       |
| 2                   |                                                                                       |
| 3                   |                                                                                       |
| 4                   |                                                                                       |
| 5                   |                                                                                       |
| 6                   |                                                                                       |
| 7                   |                                                                                       |
| 8                   |                                                                                       |
| 9                   |                                                                                       |
| 10                  |                                                                                       |
| 11                  |                                                                                       |
| 12                  |                                                                                       |
| 13                  |                                                                                       |
| 14                  |                                                                                       |
| 15                  |                                                                                       |
| 16                  |                                                                                       |
| 17                  |                                                                                       |
| 18                  |                                                                                       |
| 19                  |                                                                                       |
| 20                  |                                                                                       |

|    |  |
|----|--|
| 21 |  |
| 22 |  |
| 23 |  |
| 24 |  |
| 25 |  |
| 26 |  |
| 27 |  |
| 28 |  |
| 29 |  |
| 30 |  |
| 31 |  |
| 32 |  |

**Q 2 - Do you also use plants for tea / medicine / food / drink / animal feed, crafts, veterinary use etc ?**

| <b>Plant</b> | <b>Uses</b> |
|--------------|-------------|
|              |             |
|              |             |
|              |             |
|              |             |
|              |             |
|              |             |

**Q3 - Are there food plants that you also use in medicine?**

• Yes ☐ No ☐

**Q3 -1- If yes, which ones :**

|     |      |
|-----|------|
| 1 / | 9 /  |
| 2 / | 10 / |
| 3 / | 11 / |
| 4 / | 12 / |
| 5 / | 13 / |
| 6 / | 14 / |
| 7 / | 15 / |
| 8 / | 16 / |

**Q3-2- What do you use them for and how ?**

| <b>Plant number</b> | <b>Therapeutic purposes</b><br>( dermatological, respiratory, genitourinary, digestive system , neurological, cardiovascular, etc. ) | <b>Mode of use</b> |
|---------------------|--------------------------------------------------------------------------------------------------------------------------------------|--------------------|
| 1                   |                                                                                                                                      |                    |
| 2                   |                                                                                                                                      |                    |
| 3                   |                                                                                                                                      |                    |
| 4                   |                                                                                                                                      |                    |
| 5                   |                                                                                                                                      |                    |
| 6                   |                                                                                                                                      |                    |

|    |  |  |
|----|--|--|
| 7  |  |  |
| 8  |  |  |
| 9  |  |  |
| 10 |  |  |
| 11 |  |  |
| 12 |  |  |
| 13 |  |  |

**Q4 - Are there any medicinal plants that you also use for food?**

• Yes ☐ No ☐

**Q4-1- If yes, which ones:**

|     |      |
|-----|------|
| 1 / | 9 /  |
| 2 / | 10 / |
| 3 / | 11 / |
| 4 / | 12 / |
| 5 / | 13 / |
| 6 / | 14 / |
| 7   | 15 / |
| 8 / | 16 / |

**Q4-2- What do you use them for ?**

| <b>Plant number</b> | <b>Use ( Tagine, salad, desserts, etc. )</b> |
|---------------------|----------------------------------------------|
| 1                   |                                              |
| 2                   |                                              |
| 3                   |                                              |
| 4                   |                                              |
| 5                   |                                              |
| 6                   |                                              |
| 7                   |                                              |
| 8                   |                                              |
| 9                   |                                              |
| 10                  |                                              |
| 11                  |                                              |
| 12                  |                                              |
| 13                  |                                              |
| 14                  |                                              |
| 15                  |                                              |
| 16                  |                                              |



**Q5 - Do you cook?**

• Yes ☐ No ☐

**Q5-1- If yes, how often:**

- A. ... .. times / day
- B. ... .. times / week

**Q5-2- For whom?**

.....

.....

.....

**Q5-3- What types of dishes?**

Traditional ☐ Modern ☐

.....

.....

.....

.....

.....

.....

.....

.....

**If you have any questions and comments, don't hesitate!**

.....

.....

.....

.....

**Thank you for your kind participation!**

تاريخ: ..... رقم: .....

## استبيان

### معرفة النباتات الطبية المستعملة في مطابخ مراكش

#### الإطار العام

تعتبر النساء في البلدان الإسلامية أكثر دراية بالأعشاب الطبية حيث يهتمن بشكل أساسي بالأطفال وكبار السن في الأسرة، لكن الرجال لديهم أيضاً معرفة عميقة بالأعشاب في هذا المجال وغيره. نظراً لأن استخدام النباتات متجذر في التداوي وفن الطهي والصناعة التقليدية بشكل خاص وفي الحياة اليومية للمراكشيين على بشكل عام، يهدف هذا الاستبيان إلى المساهمة في تعزيز الاستخدام ومعرفة النباتات المفيدة في بيوت المراكشيين من خلال مقارنة هذه المعرفة بين الرجال والنساء من مختلف الفئات العمرية والوضع الاجتماعي.

#### انتلاف

ستكون هذه الدراسة موضوع مقالة علمية تهدف إلى دراسة معرفة النباتات الطبية في مطابخ مراكش. نرجو منكم ملاً هذا الاستبيان، مشاركتكم في هذا المشروع البحثي تطوعية تماماً، ولك الحق في عدم الإجابة على أي سؤال. يمكنك أيضاً طلب مزيد من المعلومات حول المشروع ونوع الأسئلة قبل قبول المشاركة.

---

## الجزء الأول: معلومات حول المشارك

---

الاسم والنسب: ..... الرمز: .....

النوع: أنثى ☐ ذكر ☐ لا ترغب في تحديد ذلك ☐

السن: 30-39 ☐ 40-49 ☐ 50-59 ☐

الوضع العائلي: أعزب ☐ متزوج (ة) ☐ مطلق(ة) ☐ أرمل(ة) ☐

المستوى الدراسي: بدون ☐ الابتدائي ☐ الثانوي ☐ الجامعي ☐

المهنة: .....

عدد أفراد الأسرة الإجمالي في السكن: .....

العدد حسب النوع: الاناث: ..... الذكور: .....

العدد حسب الفئة العمرية:

أقل من 10 سنوات: ..... ؛ 10-20 : ..... ؛ 20-30 : ..... ؛ 30-40 : ..... ؛ 40-50 : ..... ؛ 50-60 : .....

أكثر من 60 سنة: .....

مسار الحياة:

.....

.....

.....

.....

.....

.....

.....

العنوان: .....

الأصل: أمازيغي(ة) ☐ عربي(ة) ☐ أمازيغي(ة) / عربي(ة) ☐

اللغة: الأمازيغية ☐ الدارجة ☐ العربية ☐ الفرنسية ☐ الانجليزية ☐ الإسبانية ☐

---

## الجزء 2: استخدام النباتات

---

س 1 - ما النباتات التي تستخدمها في حياتك؟

|     |     |
|-----|-----|
| 17/ | 1/  |
| 18/ | 2/  |
| 19/ | 3/  |
| 20/ | 4/  |
| 21/ | 5/  |
| 22/ | 6/  |
| 23/ | 7/  |
| 24/ | 8/  |
| 25/ | 9/  |
| 26/ | 10/ |
| 27/ | 11/ |
| 28/ | 12/ |
| 29/ | 13/ |
| 30/ | 14/ |
| 31/ | 15/ |
| 32/ | 16/ |

س 1-1 -في أي شيء تستعملونها؟

| رقم النبتة | استعمال<br>(طاجين، سلطة، حلويات، صنع سلال، نجارة، دواء، إلخ...) |
|------------|-----------------------------------------------------------------|
| 1          |                                                                 |
| 2          |                                                                 |
| 3          |                                                                 |
| 4          |                                                                 |
| 5          |                                                                 |
| 6          |                                                                 |
| 7          |                                                                 |
| 8          |                                                                 |
| 9          |                                                                 |
| 10         |                                                                 |
| 11         |                                                                 |
| 12         |                                                                 |
| 13         |                                                                 |
| 14         |                                                                 |
| 15         |                                                                 |
| 16         |                                                                 |
| 17         |                                                                 |
| 18         |                                                                 |
| 19         |                                                                 |
| 20         |                                                                 |
| 21         |                                                                 |
| 22         |                                                                 |
| 23         |                                                                 |
| 24         |                                                                 |
| 25         |                                                                 |
| 26         |                                                                 |

|  |    |
|--|----|
|  | 27 |
|  | 28 |
|  | 29 |
|  | 30 |
|  | 31 |
|  | 32 |

س 2 - هل تستخدم النباتات أيضًا في الشاي / الأدوية / الطعام / الشراب / علف الحيوانات، الصناعة التقليدية، الاستخدام البيطري، إلخ...

| الاستعمال | النبات |
|-----------|--------|
|           |        |
|           |        |
|           |        |
|           |        |
|           |        |
|           |        |
|           |        |
|           |        |
|           |        |
|           |        |

س 3 - هل توجد نباتات غذائية تستخدمها أيضًا في الطب؟

☐ نعم ☐ لا

س 3-1- إذا كانت الإجابة بنعم، فما هي؟

|    |     |
|----|-----|
| 1/ | 9/  |
| 2/ | 10/ |
| 3/ | 11/ |
| 4/ | 12/ |
| 5/ | 13/ |
| 6/ | 14/ |
| 7/ | 15/ |
| 8/ | 16/ |

س 3-2- في أي شيء تستخدمهم وكيف؟

| رقم<br>النبذة | الأغراض علاجية<br>(الجلدية، الجهاز التنفسي، الجهاز البولي التناسلي، الجهاز<br>الهضمي، الجهاز العصبي، القلب والأوعية الدموية، إلخ) | طريقة الاستعمال |
|---------------|-----------------------------------------------------------------------------------------------------------------------------------|-----------------|
| 1             |                                                                                                                                   |                 |
| 2             |                                                                                                                                   |                 |
| 3             |                                                                                                                                   |                 |
| 4             |                                                                                                                                   |                 |
| 5             |                                                                                                                                   |                 |
| 6             |                                                                                                                                   |                 |
| 7             |                                                                                                                                   |                 |
| 8             |                                                                                                                                   |                 |
| 9             |                                                                                                                                   |                 |
| 10            |                                                                                                                                   |                 |

|  |  |    |
|--|--|----|
|  |  | 11 |
|  |  | 12 |
|  |  | 13 |
|  |  | 14 |
|  |  | 15 |
|  |  | 16 |

س 4 - هل هناك أي نباتات طبية تستخدمها أيضًا كغذاء؟

☐ نعم ☐ لا

س 4-1- إذا كانت الإجابة بنعم، فما هي؟

|    |     |
|----|-----|
| 1/ | 9/  |
| 2/ | 10/ |
| 3/ | 11/ |
| 4/ | 12/ |
| 5/ | 13/ |
| 6/ | 14/ |
| 7/ | 15/ |
| 8/ | 16/ |

س 4-2- في أي شيء تستعملهم؟

| رقم<br>النبذة | استعمال (طاجين، سلطة، حلويات ... الخ) |
|---------------|---------------------------------------|
| 1             |                                       |
| 2             |                                       |



|  |    |
|--|----|
|  | 3  |
|  | 4  |
|  | 5  |
|  | 6  |
|  | 7  |
|  | 8  |
|  | 9  |
|  | 10 |
|  | 11 |
|  | 12 |
|  | 13 |
|  | 14 |
|  | 15 |
|  | 16 |

س 5 - هل تطبخ؟

☐ نعم ☐ لا

س5-1- إذا كانت الإجابة بنعم، فكم مرة

أ ..... مرات / يوم

ب ..... مرات / أسبوع

س 5-2- لمن؟

.....

.....

س 5-3- ما أنواع الأطباق؟

☐ تقليدي ☐ عصري

.....

.....

.....

.....

.....

.....

.....

.....

.....

.....

.....

إذا كان لديكم أي أسئلة وتعليقات، من فضلك لا تتردد!

.....

.....

.....

.....

.....

.....

شكرا لكم على مشاركتكم القيمة!
